# Supplementary material
Source: ML conference proceedings conference paper supplement (https://openaccess.thecvf.com/content/CVPR2024/html/Jiang_PH-Net_Semi-Supervised_Breast_CVPR_2024_paper.html)
Supplement: Supplementary file 1 [file Jiang_PH-Net_Semi-Supervised_Breast_CVPR_2024_supplemental.pdf]

# PH-Net: Semi-Supervised Breast Lesion Segmentation via Patch-wise Hardness

## Supplementary Material

### 1. More hyper-parameters analysis

**Different weights for losses.** The impact of our proposed adaptive patch augmentation and hard-patch contrastive learning modules depends on the weights  $\lambda_u$  and  $\lambda_c$  of the unsupervised loss  $\mathcal{L}_u$  and contrastive loss  $\mathcal{L}_c$ . Networks with low  $\lambda_u$  and  $\lambda_c$  cannot effectively utilize the effects of our modules, while high  $\lambda_u$  and  $\lambda_c$  might disrupt the training of the model on labeled data. Moreover, coordination between them is also necessary to prevent negative effects. Therefore, setting the weights for losses is quite significant for our method’s effectiveness. Tab. 1 shows our ablation study for different  $\lambda_u$  and  $\lambda_c$ . Our method obtains the best performance when both  $\lambda_u$  and  $\lambda_c$  are set to 1.

| $\lambda_u$ | $\lambda_c$ | UDIAT        |              | BUSI         |              |
|-------------|-------------|--------------|--------------|--------------|--------------|
|             |             | Dice(%)      | IoU(%)       | Dice(%)      | IoU(%)       |
| 0.5         | 0.5         | 85.06        | 74.02        | 75.88        | 61.10        |
| 0.5         | 1           | 85.58        | 74.80        | 75.97        | 61.23        |
| 1           | 1           | <b>86.23</b> | <b>75.80</b> | <b>76.84</b> | <b>62.39</b> |
| 1.5         | 1           | 86.10        | 75.60        | 76.47        | 61.88        |
| 1           | 1.5         | 85.44        | 74.59        | 76.09        | 61.38        |
| 1           | 0.5         | 85.61        | 74.85        | 75.92        | 61.15        |

Table 1. Ablation study of loss function weights based ResNet-50 on the UDIAT and BUSI datasets under 1/4 partition protocol.

**Different epochs for pre-training.** We pre-train the model before formal training, feeding only labeled data for the first few epochs. Too large pre-training epochs will make the model overly rely on labeled data and lead to poor generalization, while small epochs will make the pre-training insufficient and prevent the model from having basic segmentation ability before formal training. Therefore, the setting of the pre-training epoch is important for the subsequent training of the model. We ablate different pre-training epochs in Tab. 2, which shows that our method achieves the best results when the pre-training epoch is taken as 10.

| Epochs | UDIAT        |              | BUSI         |              |
|--------|--------------|--------------|--------------|--------------|
|        | Dice(%)      | IoU(%)       | Dice(%)      | IoU(%)       |
| 0      | 84.59        | 73.31        | 75.17        | 60.19        |
| 5      | 86.04        | 75.51        | 76.40        | 61.77        |
| 10     | <b>86.23</b> | <b>75.80</b> | <b>76.84</b> | <b>62.39</b> |
| 15     | 85.83        | 75.17        | 76.36        | 61.74        |
| 20     | 85.47        | 74.64        | 76.10        | 61.38        |

Table 2. Ablation study of pre-training epochs based ResNet-50 on the UDIAT and BUSI datasets under 1/4 partition protocol.

### 2. More ablation studies on BUSI

**Ablation of different components.** Tab. 3 illustrates the effectiveness of our method for each component on the BUSI dataset with ResNet-50 [4] as the backbone. It is obvious that Method III with all components superior to the other methods, fully demonstrating the validity of each component in our method.

| Method  | APA | HPC | MB | Dice(%)      | IoU(%)       |
|---------|-----|-----|----|--------------|--------------|
| SupOnly |     |     |    | 73.69        | 58.34        |
| I       | ✓   |     |    | 75.61        | 60.76        |
| II      | ✓   | ✓   |    | 76.59        | 62.04        |
| III     | ✓   | ✓   | ✓  | <b>76.84</b> | <b>62.39</b> |

Table 3. Ablation study of different components on BUSI dataset under 1/4 partition protocol. APA: Adaptive Patch Augmentation. HPC: Hard-Patch Contrastive Learning. MB: Memory Bank.

**Ablation of hyper-parameters.** We conduct more ablation experiments on the BUSI dataset with ResNet-50 [4] as the backbone for the hyperparameters. For the patch shielding parameter  $\beta$ , the best performance is obtained when  $\beta = 30\%$  as shown in Tab. 4. For the confidence threshold  $\gamma$ , it can be seen from Tab. 5 that taking 0.9 gives the best results for our method.

| $\beta$ | 0     | 10%   | 20%   | 30%          | 40%   |
|---------|-------|-------|-------|--------------|-------|
| Dice(%) | 75.14 | 75.49 | 76.03 | <b>76.84</b> | 76.33 |
| IoU(%)  | 60.15 | 60.60 | 61.30 | <b>62.39</b> | 61.70 |

Table 4. Ablation study of patch shielding parameter  $\beta$  on the BUSI dataset under 1/4 partition protocol.

| $\gamma$ | 0.70  | 0.80  | 0.85  | 0.90         | 0.95  |
|----------|-------|-------|-------|--------------|-------|
| Dice(%)  | 75.91 | 76.39 | 76.51 | <b>76.84</b> | 76.60 |
| IoU(%)   | 61.15 | 61.77 | 61.93 | <b>62.39</b> | 62.05 |

Table 5. Ablation study of confidence threshold  $\gamma$  on the BUSI dataset under 1/4 partition protocol.

### 3. More visual comparison results

We perform more visual comparison with SupOnly and other eight state-of-the-art methods including CPS [2], PS-MT [6], U<sup>2</sup>PL [8], iMAS [9], AugSeg [10], BCP [1], PDF-UNet [5] and RA-UGMT [3] on the UDIAT and BUSI datasets, with ResNet-50 [4] and U-Net [7] as the backbone, as shown in Fig. 1 and Fig. 2.

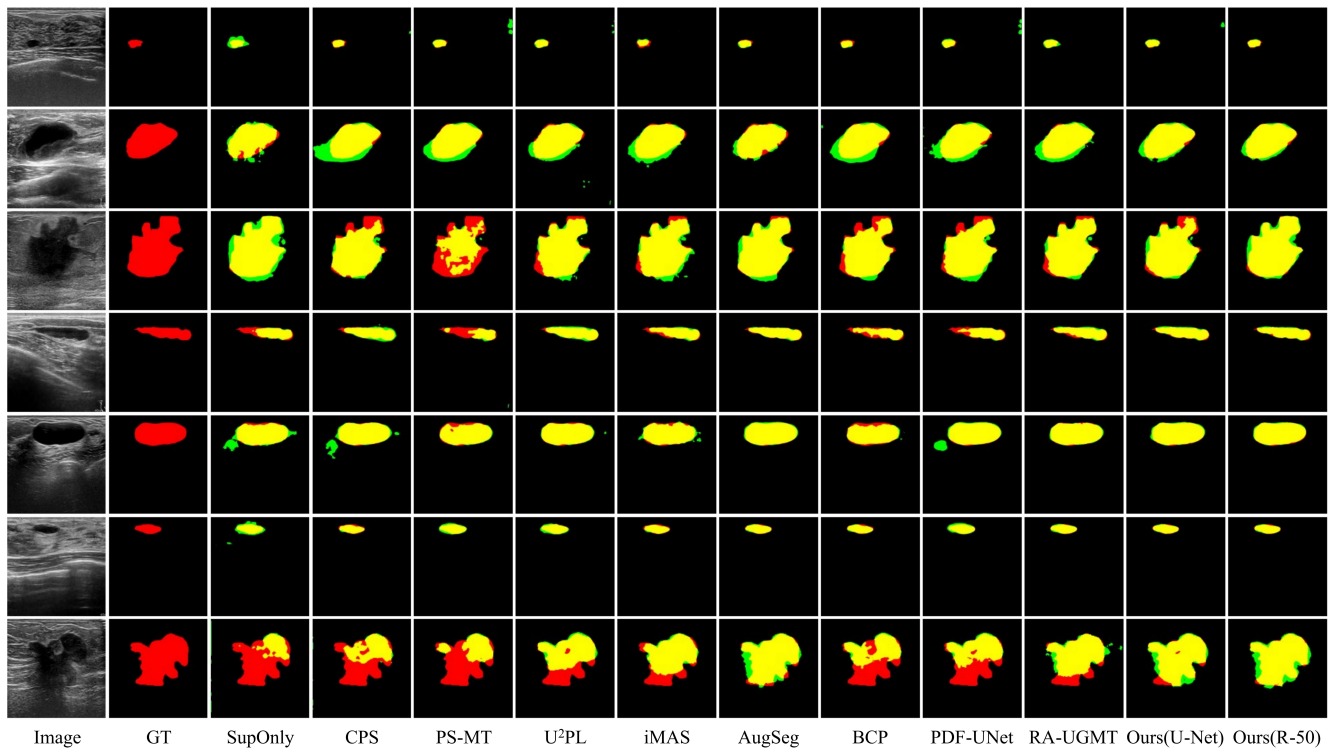

Figure 1. More visual comparison with different state-of-the-art methods on the UDIAT dataset under 1/4 partition protocol. Red, green and yellow regions represent ground truth, prediction and overlapping regions, respectively.

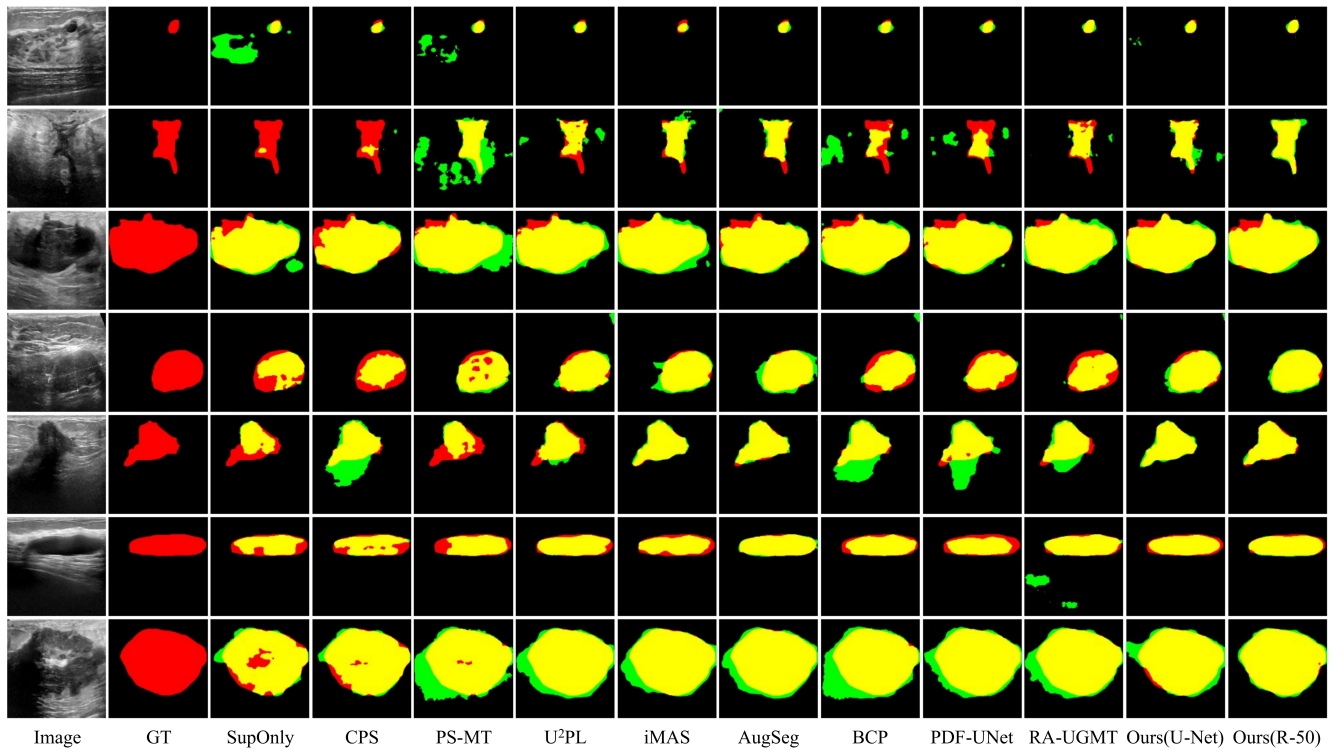

Figure 2. More visual comparison with different state-of-the-art methods on the BUSI dataset under 1/4 partition protocol. Red, green and yellow regions represent ground truth, prediction and overlapping regions, respectively.

## References

- [1] Yunhao Bai, Duowen Chen, Qingli Li, Wei Shen, and Yan Wang. Bidirectional copy-paste for semi-supervised medical image segmentation. In *Proceedings of the IEEE/CVF Conference on Computer Vision and Pattern Recognition*, pages 11514–11524, 2023. [1](#)
- [2] Xiaokang Chen, Yuhui Yuan, Gang Zeng, and Jingdong Wang. Semi-supervised semantic segmentation with cross pseudo supervision. In *Proceedings of the IEEE/CVF Conference on Computer Vision and Pattern Recognition*, pages 2613–2622, 2021. [1](#)
- [3] Muhammad Umar Farooq, Zahid Ullah, and Jeonghwan Gwak. Residual attention based uncertainty-guided mean teacher model for semi-supervised breast masses segmentation in 2d ultrasonography. *Computerized Medical Imaging and Graphics*, 104:102173, 2023. [1](#)
- [4] Kaiming He, Xiangyu Zhang, Shaoqing Ren, and Jian Sun. Deep residual learning for image recognition. In *Proceedings of the IEEE Conference on Computer Vision and Pattern Recognition*, pages 770–778, 2016. [1](#)
- [5] Ahmed Iqbal and Muhammad Sharif. Unet: A semi-supervised method for segmentation of breast tumor images using a u-shaped pyramid-dilated network. *Expert Systems with Applications*, 221:119718, 2023. [1](#)
- [6] Yuyuan Liu, Yu Tian, Yuanhong Chen, Fengbei Liu, Vasileios Belagiannis, and Gustavo Carneiro. Perturbed and strict mean teachers for semi-supervised semantic segmentation. In *Proceedings of the IEEE/CVF Conference on Computer Vision and Pattern Recognition*, pages 4258–4267, 2022. [1](#)
- [7] Olaf Ronneberger, Philipp Fischer, and Thomas Brox. U-net: Convolutional networks for biomedical image segmentation. In *Medical Image Computing and Computer-Assisted Intervention—MICCAI 2015: 18th International Conference, Munich, Germany, October 5-9, 2015, Proceedings, Part III 18*, pages 234–241. Springer, 2015. [1](#)
- [8] Yuchao Wang, Haochen Wang, Yujun Shen, Jingjing Fei, Wei Li, Guoqiang Jin, Liwei Wu, Rui Zhao, and Xinyi Le. Semi-supervised semantic segmentation using unreliable pseudo-labels. In *Proceedings of the IEEE/CVF Conference on Computer Vision and Pattern Recognition*, pages 4248–4257, 2022. [1](#)
- [9] Zhen Zhao, Sifan Long, Jimin Pi, Jingdong Wang, and Luping Zhou. Instance-specific and model-adaptive supervision for semi-supervised semantic segmentation. In *Proceedings of the IEEE/CVF Conference on Computer Vision and Pattern Recognition*, pages 23705–23714, 2023. [1](#)
- [10] Zhen Zhao, Lihe Yang, Sifan Long, Jimin Pi, Luping Zhou, and Jingdong Wang. Augmentation matters: A simple-yet-effective approach to semi-supervised semantic segmentation. In *Proceedings of the IEEE/CVF Conference on Computer Vision and Pattern Recognition*, pages 11350–11359, 2023. [1](#)
